# Supplementary material
Source: PubMed Central journal article supplement (PMC3093636)
Supplement: NIHMS277848-supplement-1.pdf [file NIHMS277848-supplement-1.pdf]

**Table S1. Power for Primary Endpoint in INVEST-GENES**

| MAF | Mode | RR    | Alpha                  | Alpha        |
|-----|------|-------|------------------------|--------------|
|     |      |       | <b>0.05</b>            | <b>0.007</b> |
|     |      |       | <b>Predicted Power</b> |              |
| 0.1 | A    | 1.25  | 0.30                   | 0.10         |
|     | A    | 1.50  | 0.76                   | 0.47         |
|     | A    | >1.75 | <b>0.97</b>            | <b>0.85</b>  |
| 0.2 | A    | 1.25  | 0.47                   | 0.20         |
|     | A    | 1.5   | <b>0.92</b>            | 0.75         |
|     | A    | >1.75 | <b>0.99</b>            | <b>0.97</b>  |
| 0.3 | A    | 1.25  | 0.55                   | 0.27         |
|     | A    | 1.50  | <b>0.96</b>            | <b>0.83</b>  |
|     | A    | >1.75 | <b>0.99</b>            | <b>0.99</b>  |
| 0.4 | A    | 1.25  | 0.59                   | 0.30         |
|     | A    | 1.50  | <b>0.96</b>            | <b>0.85</b>  |
|     | A    | >1.75 | <b>0.99</b>            | <b>0.99</b>  |
| 0.1 | D    | 1.25  | 0.25                   | 0.08         |
|     | D    | 1.50  | 0.68                   | 0.38         |
|     | D    | >1.75 | <b>0.93</b>            | 0.75         |
| 0.2 | D    | 1.25  | 0.33                   | 0.12         |
|     | D    | 1.5   | 0.79                   | 0.52         |
|     | D    | >1.75 | <b>0.97</b>            | <b>0.87</b>  |
| 0.3 | D    | 1.25  | 0.32                   | 0.11         |
|     | D    | 1.50  | 0.76                   | 0.49         |
|     | D    | >1.75 | <b>0.95</b>            | <b>0.82</b>  |
| 0.4 | D    | 1.25  | 0.27                   | 0.09         |
|     | D    | 1.50  | 0.66                   | 0.37         |
|     | D    | >1.75 | <b>0.89</b>            | 0.68         |

MAF, minor allele frequency; A, additive mode of inheritance; D, dominant mode of inheritance, RR, relative risk.

Table S2. LXRA gene (*NR1H3*) Diplotypes frequencies in INVEST-GENES case control data set

| <b>Diplotype</b> | <b>rs11039149 (A&gt;G)</b><br><b>rs12221497 (G&gt;A)</b><br><b>rs2279238 (C&gt;T)</b> | <b>Diplotype frequency</b><br><b>N (%)</b> |
|------------------|---------------------------------------------------------------------------------------|--------------------------------------------|
| D1               | AGC/AGC                                                                               | 231 (21.8)                                 |
| D2               | AGC/AGT                                                                               | 206 (19.5)                                 |
| D3               | AGC/GGC                                                                               | 203 (19.2)                                 |
| D4               | AGC/AAC                                                                               | 104 (9.8)                                  |
| D5               | AGT/GGC                                                                               | 86 (8.1)                                   |
| D6               | AAC/GGC                                                                               | 65 (6.1)                                   |
| D7               | GGC/GGC                                                                               | 62(5.9)                                    |
| D8               | AGT/AGT                                                                               | 60 (5.7)                                   |
| D9               | AGT/AAC                                                                               | 34 (3.2)                                   |
| D10              | AGT/AGC                                                                               | 3 (<1)                                     |
| D11              | AAC/AAC                                                                               | 2 (<1)                                     |
| D12              | AGC/GAC                                                                               | 1 (<1)                                     |
| D13              | AGT/GGT                                                                               | 1 (<1)                                     |
| D14              | AGT/AAT                                                                               | 1(<1)                                      |

Figure S1. Adjusted odds ratios for primary outcome based on common diplotypes in Non-Blacks

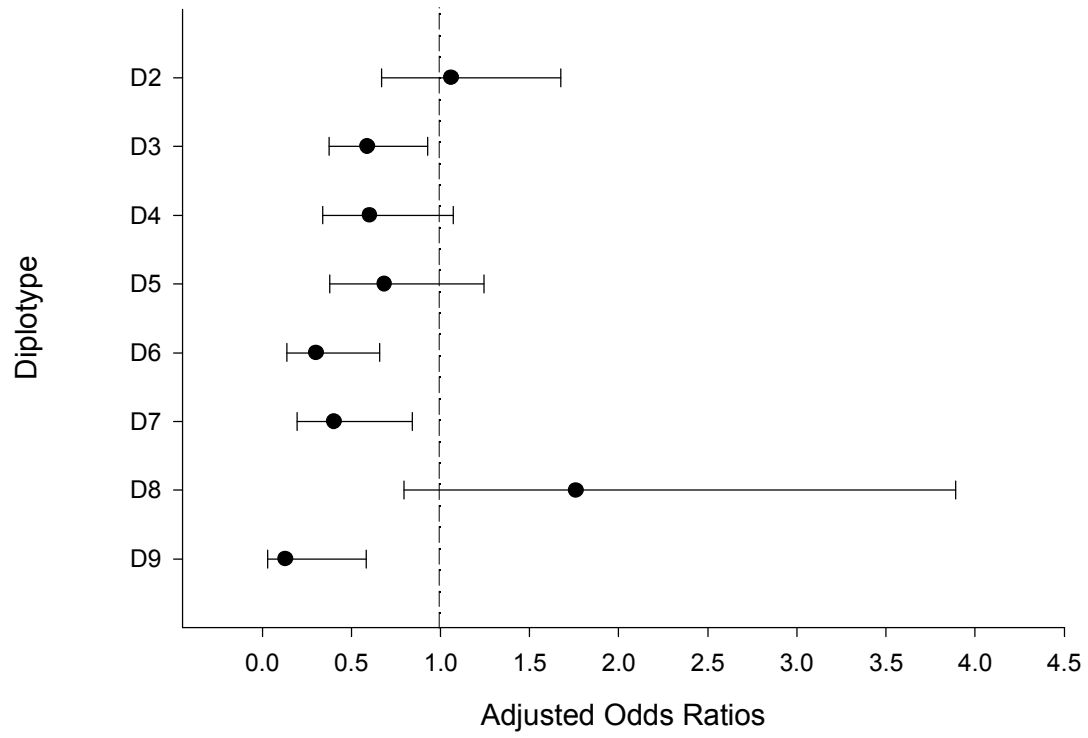

Figure S1. The reference diplotype is D1, which contains wild type alleles for the three independently significant SNPs (See Table S1). Primary outcomes are a composite of the first occurrence of all-cause death, nonfatal MI or nonfatal stroke. Odds Ratios (OR) from logistic regression adjusted for: age, sex, race/ethnicity, BMI, INVEST treatment strategy, history of CHF, history of MI and history of diabetes at baseline.
